# Supplementary material
Source: PubMed Central journal article supplement (PMC7524479)
Supplement: jci-130-140155-s361.pdf [file jci-130-140155-s361.pdf]

## Figure S1

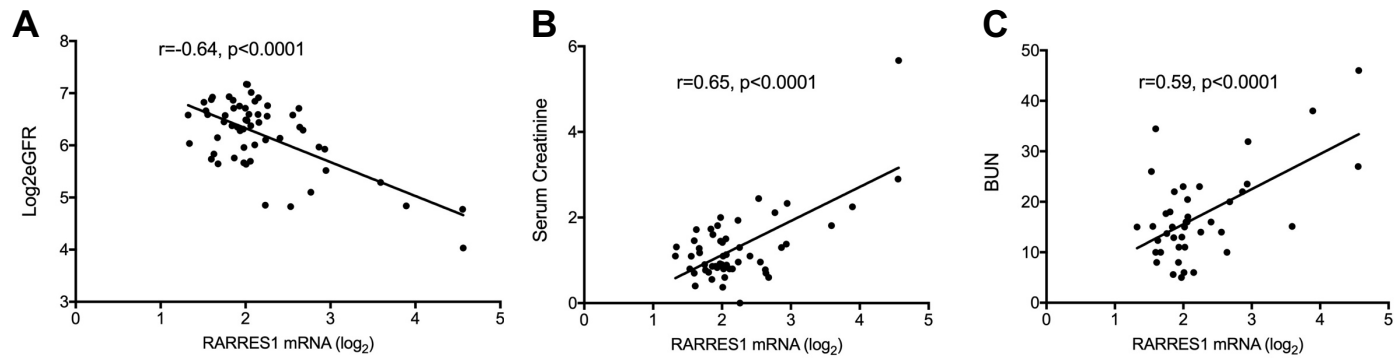

**Supplementary Figure 1: *RARRES1* mRNA expression in CKD cohort in NEPTUNE dataset.** The association of glomerular *RARRES1* expression level with eGFR (A), serum creatinine (B), and BUN (C) in NEPTUNE CKD dataset.

# Figure S2

## A RARRES1 Over-Expression in Diabetic Nephropathy vs. Healthy Living Donor

Woroniecka Diabetes Glom (22)  
Human | microarray | Glomeruli

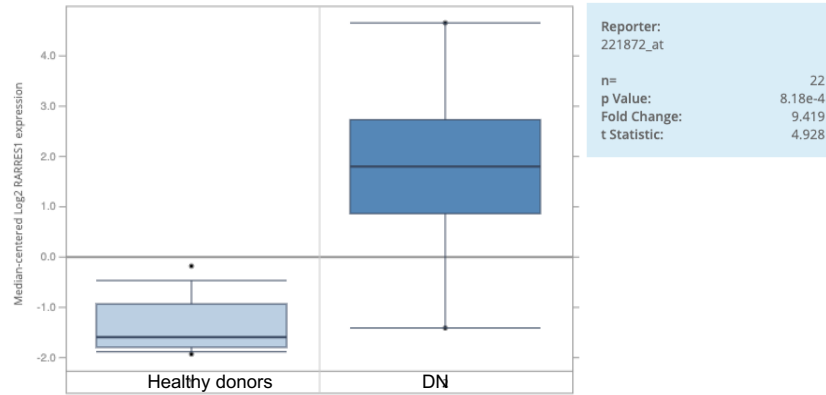

## B RARRES1 Expression Correlated with GFR (All Measured Samples)

Ju CKD Glom (199)  
Human | microarray | Glomeruli

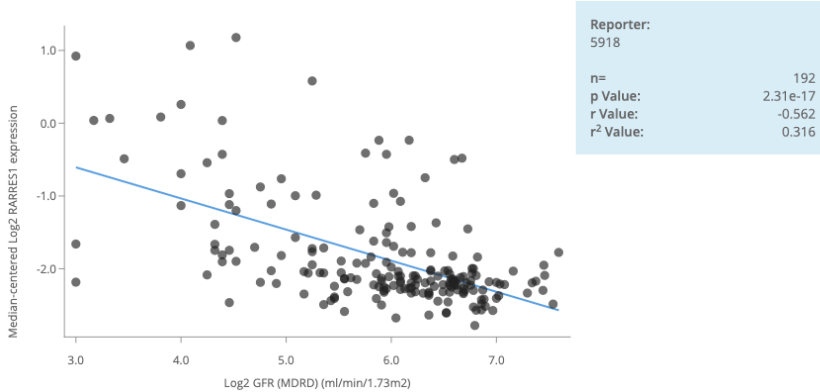

## C RARRES1 Expression Correlated with GFR (All Measured Samples)

Woroniecka Diabetes Glom (22)  
Human | microarray | Glomeruli

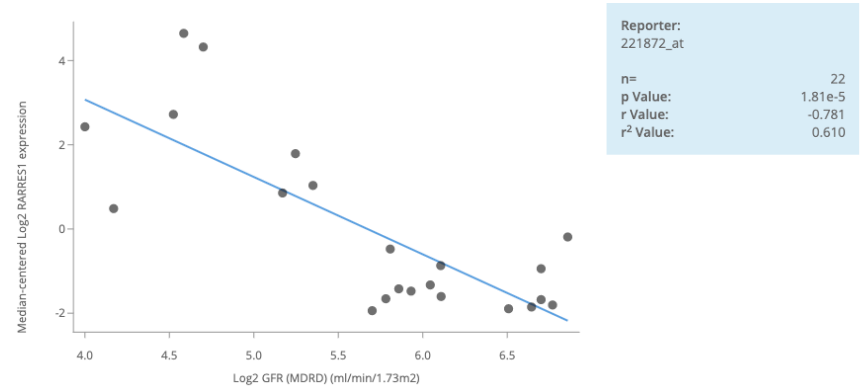

**Supplementary Figure 2: *RARRES1* mRNA expression in CKD in Nephroseq dataset (nephroseq.org).** (A) *RARRES1* expression in the glomeruli of DN patients and living donors. (B) Glomerular *RARRES1* expression correlates with eGFR in CKD cohort. (C) Glomerular *RARRES1* expression correlates with eGFR in DN cohort.

**Figure S3**

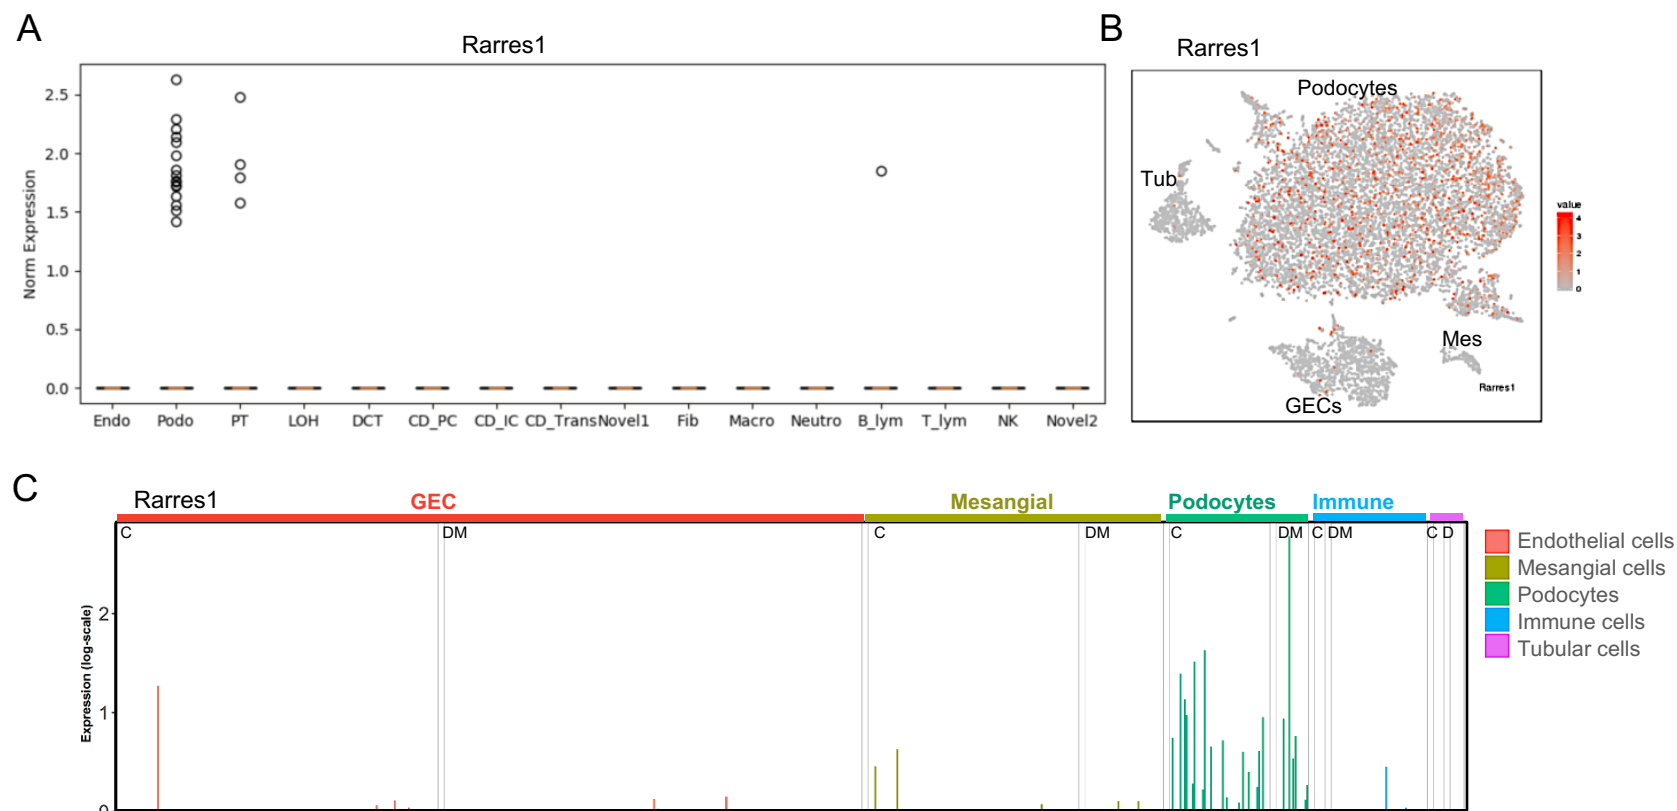

**Supplementary Figure 3: Single-cell RNA sequencing (sc-RNAseq) data of RARRES1.** (A) sc-RNA seq data from murine kidney (Park et al. 2018). (B) sc-RNAseq data from isolated murine glomerular cells (Karaiskos et al. 2018), Mes, mesangial cells; GECs, glomerular endothelial cells; Tub, tubular cells. (C) sc-RNAseq data from isolated glomerular cells from control and diabetic mouse (Fu et al. 2019). C, control; DM, diabetic.

Figure S4

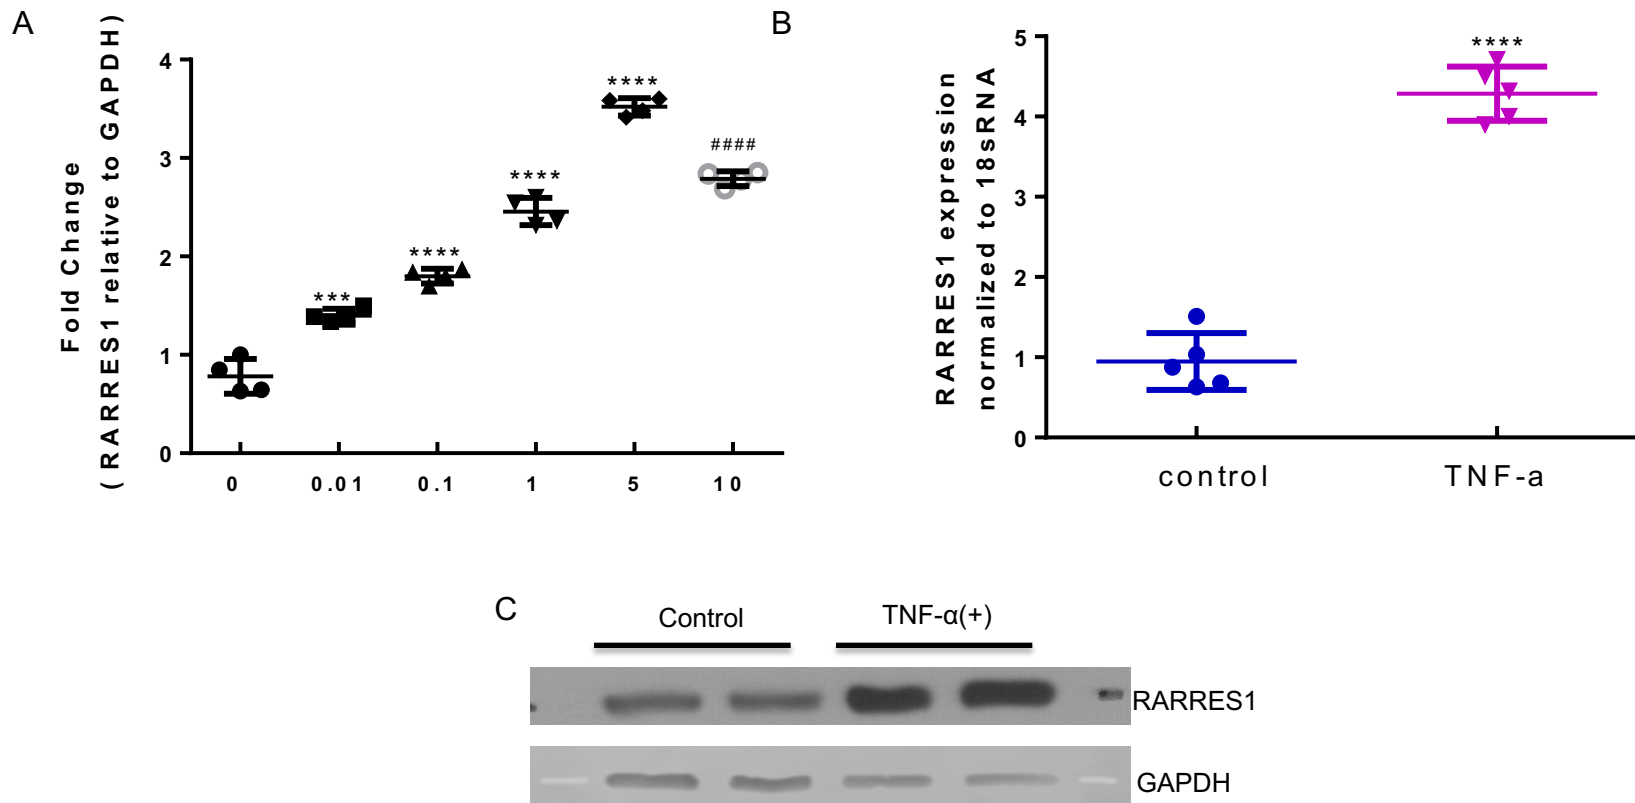

**Supplementary Figure 4: RARRES1 is regulated by RA and TNF- $\alpha$ .** (A) Real time PCR of RARRES1 with increasing doses of RA ( $\mu\text{M}$ ) in cultured human podocytes. (B-C) TNF- $\alpha$  stimulate RARRES1 mRNA expression (B) and protein expression (C) in human podocytes. (\*\*p<0.01 and \*\*\*\*p<0.001 VS control, ####p<0.05 vs 5 $\mu\text{M}$  atRA)

**Figure S5**

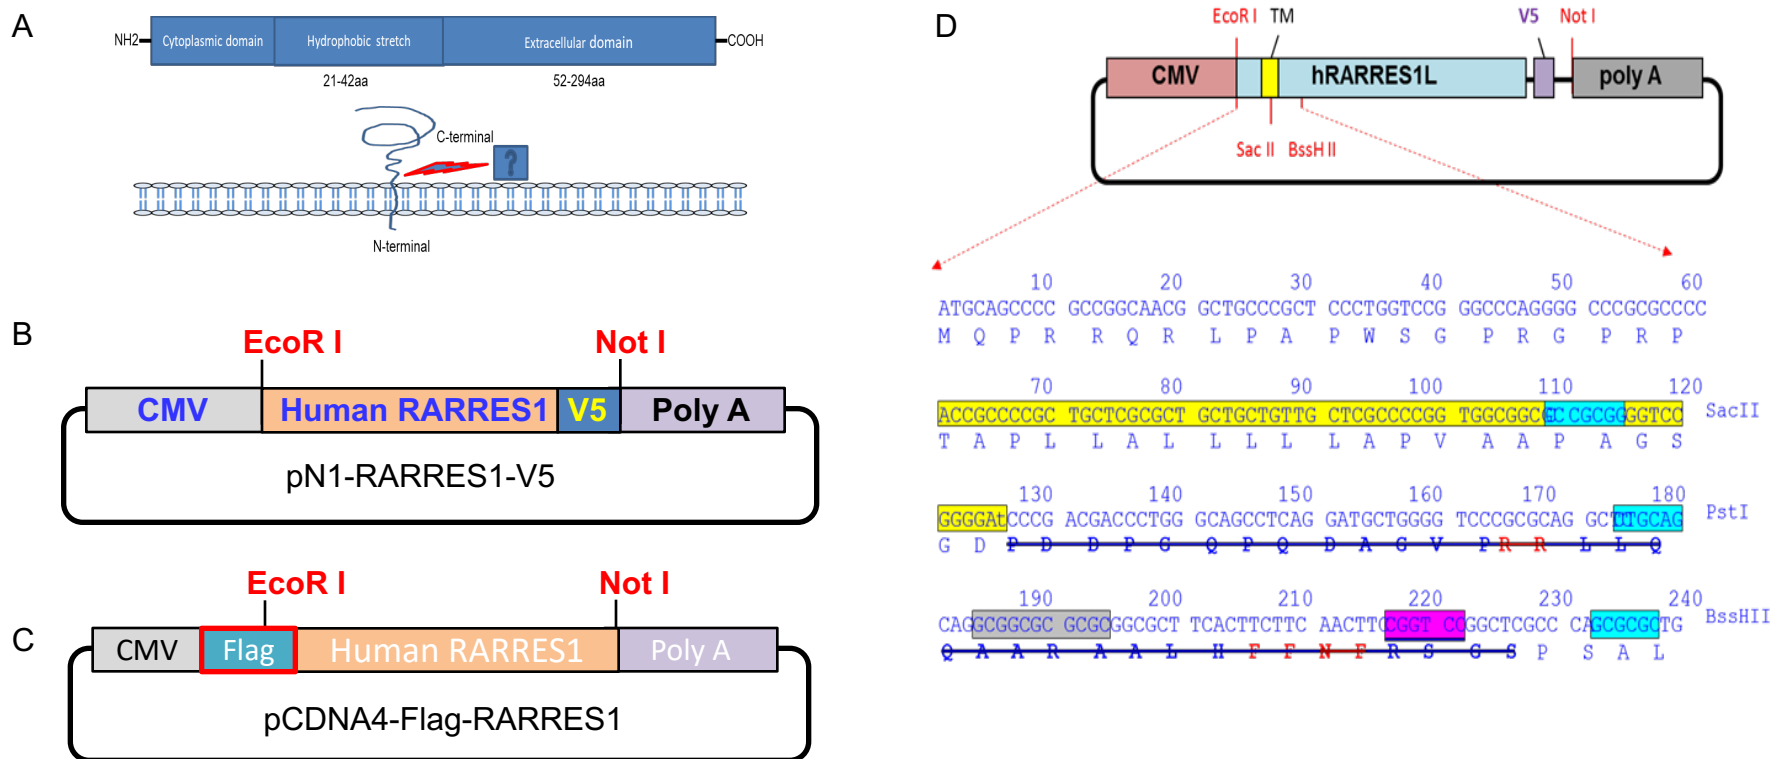

**Supplementary Figure 5: Schematics of RARRES1 wildtype and mutant expression plasmids** (A) The structure of the RARRES1 isoform 1 precursor, which is a type I transmembrane protein. (B) The schema of C-terminal V5- tagged RARRES1 overexpression plasmid. (C) The schema of N-terminal FLAG tagged RARRES1 overexpression plasmid. (D) Region surrounding aa 43-76 residues for constructing deletions or point mutation of RARRES1 as shown in Figure 3.

**Figure S6**

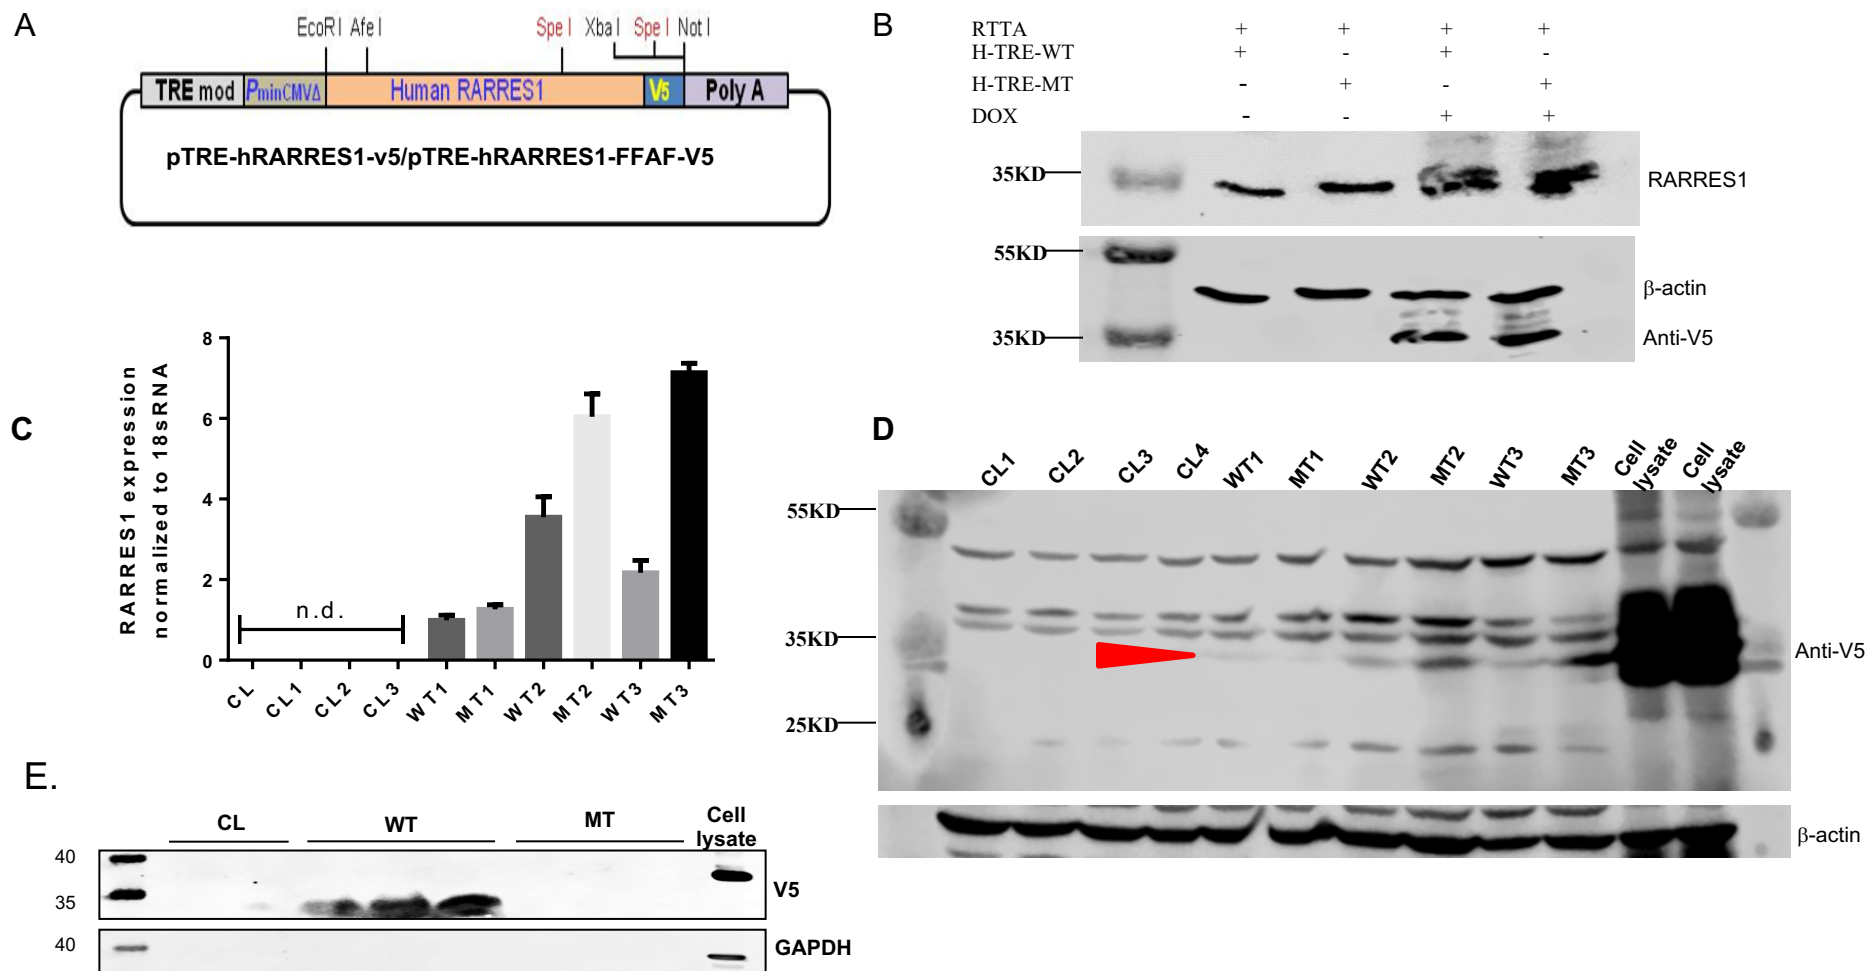

**Supplementary Figure 6: Transgenic overexpression of RARRES1<sup>WT</sup> and RARRES1<sup>MT</sup> in mice.** (A) tetracycline-inducible RARRES1 wild and mutant) overexpression plasmid. (B) pN1-RARRES1(FFNF)-v5 and pN1-RARRES1(FFAF)-v5 was transfected into Tet-U2OS cells. Induction with doxycycline resulted in the expression of RARRES1(FFNF)-V5 protein and RARRES1 (FFAF)-V5 protein. (C-D) The induction of Human RARRES1 gene expression in Nphs1-rtTA;TRE-RARRES1<sup>WT</sup> and Nphs1-rtTA;TRE-RARRES1<sup>MT</sup> mice was confirmed by real-time PCR (C) and western blot (D) analyses. E. RARRES1 was detected in the urine of RARRES1<sup>WT</sup> mice but not in RARRES1<sup>MT</sup> mice.

## Figure S7

### A LPE Rarres1\_1170: two independent founders

**Guide sequence:** UUCAGCAACAUAUUUUUAACCAC

**miRE sequence:** GAAGGCTCGAGAAGGTATATTGCTGTTGACAGTGAGCG ATGGTTATTTTATGTTGCTGAA TAGTGAAGCCACAGATGTA TTCAGCAACATAAAA  
TAACCACTGCCTACTGCCTCGGACTTCAAGGGGCTAGAATTCGAGCA

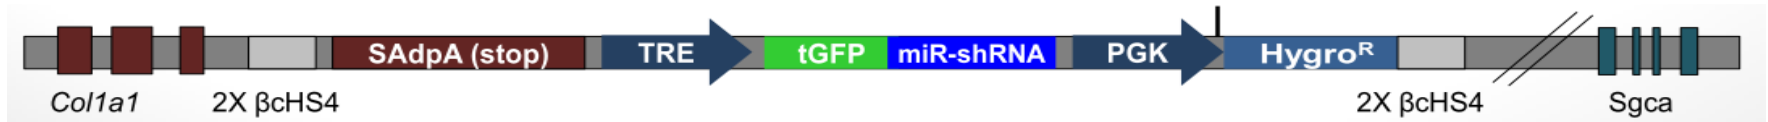

### B

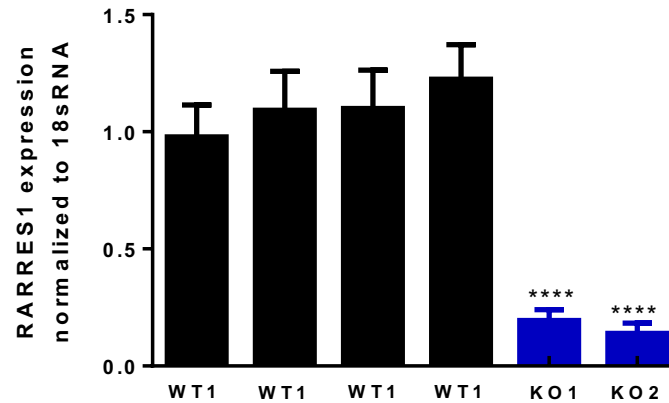

**Supplementary Figure 7: RARRES1<sup>KD</sup> in vivo.** (A) *Rarres1* shRNA expression sequences for in vivo knockdown in mice are shown (procured from Mirimus Inc.). (B) *Rarres1* knockdown validation after Dox induction by real time PCR in two independent founders. \*\*\*\*P<0.0001 vs. WT controls.

**Table S1**

| Gene           | EntrezGen | correlation-slope | correlation-GFR | correlation-PCF |
|----------------|-----------|-------------------|-----------------|-----------------|
| ALDH1A1        | 216       | -0.382            | 0.032           | -0.114          |
| ALDH1A3        | 220       | -0.190            | -0.205          | 0.050           |
| CACNA1C        | 775       | 0.139             | -0.081          | 0.158           |
| CCND2          | 894       | -0.260            | -0.183          | 0.358           |
| CLCN3          | 1182      | -0.046            | 0.024           | 0.189           |
| CRABP          | 1381      | 0.096             | 0.099           | -0.181          |
| CYP1A1         | 1543      | -0.024            | 0.045           | -0.130          |
| CYP1A2         | 1544      | -0.039            | -0.047          | -0.046          |
| CYP1B1         | 1545      | 0.014             | -0.109          | 0.247           |
| CYP26A1        | 1592      | -0.124            | -0.099          | -0.103          |
| DMD            | 1756      | 0.192             | -0.148          | 0.091           |
| FOXC1          | 2296      | 0.496             | 0.242           | -0.044          |
| GATA3          | 2625      | 0.340             | 0.026           | -0.084          |
| GDNF           | 2668      | 0.027             | -0.031          | -0.001          |
| GSR            | 2936      | -0.462            | -0.048          | 0.038           |
| GSTA4          | 2941      | 0.303             | 0.161           | -0.249          |
| GSTM2          | 2946      | 0.191             | 0.069           | -0.126          |
| Hox            | 3198      | 0.131             | 0.134           | 0.108           |
| IFRD1          | 3475      | -0.115            | 0.006           | 0.070           |
| MCAM           | 4162      | -0.284            | -0.269          | 0.174           |
| METTL1         | 4234      | -0.269            | 0.037           | 0.057           |
| PDE4           | 5141      | 0.358             | 0.162           | 0.090           |
| PITX2          | 5308      | 0.025             | -0.050          | -0.022          |
| PLAUR          | 5329      | -0.223            | -0.246          | 0.265           |
| PPARg          | 5468      | -0.100            | -0.202          | 0.109           |
| RARa           | 5914      | -0.042            | -0.073          | 0.010           |
| RARb           | 5915      | 0.126             | 0.007           | -0.036          |
| RARg           | 5916      | 0.125             | 0.004           | -0.035          |
| <b>RARRES1</b> | 5918      | -0.588            | -0.361          | 0.128           |
| CRBP           | 5947      | -0.214            | -0.160          | 0.191           |
| RBP4           | 5950      | 0.135             | 0.150           | -0.115          |
| RDH5           | 5959      | 0.021             | 0.002           | -0.067          |
| RHD1           | 6007      | -0.032            | -0.165          | 0.098           |
| RORA           | 6095      | 0.136             | 0.336           | -0.291          |
| RXRa           | 6256      | -0.056            | 0.162           | -0.156          |
| RXRb           | 6257      | 0.149             | 0.162           | -0.069          |
| RXRg           | 6258      | -0.093            | -0.017          | -0.186          |
| SIAT1          | 6480      | 0.189             | 0.076           | 0.073           |
| VDR            | 7421      | -0.271            | -0.008          | -0.193          |
| YWHAZ          | 7534      | -0.146            | -0.038          | 0.028           |
| FGF18          | 8817      | -0.247            | -0.167          | -0.003          |
| WISP1          | 8840      | 0.355             | -0.006          | -0.036          |
| ALDH1A2        | 8854      | 0.276             | 0.127           | 0.161           |
| PER2           | 8864      | 0.216             | 0.007           | -0.167          |
| LRAT           | 9227      | -0.241            | -0.080          | -0.019          |
| ISGF3G         | 10379     | 0.035             | 0.118           | 0.148           |
| GABARAP        | 23710     | 0.092             | 0.172           | 0.053           |
| KLF15          | 28999     | -0.046            | 0.175           | -0.258          |
| CYP26B1        | 56603     | 0.154             | 0.111           | -0.002          |
| GNB4           | 59345     | -0.068            | -0.164          | 0.185           |
| Stra6          | 64220     | -0.054            | 0.088           | -0.234          |
| RDH10          | 157506    | -0.214            | 0.083           | -0.085          |

**Table S1: Correlation of glomerular expression of RA-related genes with clinical outcomes.** Living donors: n=6; MN: n=49; MCD: n=48; FSGS: n=50; Other (IgA etc) n=57. Correlation with GFR (glomerular filtration rate) slope, GFR and PCR (protein creatinine ratio).



**Table S2**

| Patient #  | Gender | Age | Pathology | eGFR<br>ml/min/<br>1.73m <sup>2</sup> | 24h-UP<br>mg/day | UACR<br>mg/g | CRP<br>mg/L | Albumin<br>g/L | TP<br>g/L | BUN<br>mmol/L | Serum<br>Creatinine<br>mmol/L |
|------------|--------|-----|-----------|---------------------------------------|------------------|--------------|-------------|----------------|-----------|---------------|-------------------------------|
| Patient 1  | M      | 17  | MCD       | 131.5                                 | 887.4            | 6206.7       | 0.35        | 14.90          | 42.90     | 4.03          | 70.5                          |
| Patient 2  | M      | 16  | MCD       | 147.99                                | 4414.1           | 3128.0       | 0.17        | 12.50          | 32.50     | 5.40          | 53.8                          |
| Patient 3  | F      | 29  | MCD       | 141.255                               | 7584.3           | 2372.4       | 0.31        | 13.50          | 33.80     | 3.20          | 35.4                          |
| Patient 4  | F      | 17  | MCD       | 108.99                                | 11969.4          | 3661.5       | 6.09        | 18.57          | 48.40     | 2.55          | 70.4                          |
| Patient 5  | F      | 45  | MCD       | 118.193                               | 1574.2           | 1095.1       | 0.21        | 28.80          | 51.50     | 4.40          | 43.2                          |
| Patient 6  | F      | 56  | FSGS      | 118.067                               | 3412.5           | 1762.2       | 0.37        | 34.50          | 66.80     | 3.20          | 34.3                          |
| Patient 7  | F      | 47  | FSGS      | 128.405                               | 537.1            | 276.2        | 2.87        | 40.10          | 69.10     | 3.30          | 32.2                          |
| Patient 8  | M      | 31  | FSGS      | 112.343                               | 880.4            | 438.7        | 1.03        | 43.00          | 76.40     | 6.40          | 80.2                          |
| Patient 9  | M      | 39  | FSGS      | 74.669                                | 3388.8           | 1726.6       | 0.15        | 40.10          | 78.00     | 8.70          | 112.5                         |
| Patient 10 | M      | 30  | FSGS      | 86.529                                | 1864.6           | 304.9        | 0.27        | 35.90          | 58.80     | 5.40          | 100.2                         |
| Patient 11 | F      | 56  | DKD       | 58.88                                 | 4629.7           | 3221.6       | 1.35        | 31.50          | 60.50     | 10.95         | 93.4                          |
| Patient 12 | M      | 69  | DKD       | 83.11                                 | 1944.7           | 1414.1       | 8.39        | 32.97          | 59.66     | 10.49         | 82.5                          |
| Patient 13 | F      | 45  | DKD       | 112.24                                | 1025.6           | 551.2        | 1.31        | 39.40          | 63.70     | 5.28          | 50.0                          |
| Patient 14 | M      | 70  | DKD       | 67.94                                 | 1505.8           | 532.6        | 5.34        | 38.37          | 67.82     | 6.49          | 96.9                          |
| Patient 15 | M      | 37  | DKD       | 70.993                                | 856.8            | 276.3        | 0.28        | 45.40          | 79.40     | 9.40          | 113.3                         |

**Table S2: Clinical parameters of biopsied patients.** eGFR, estimated glomerular filtration rate; 24h-UP, 24-hour urine protein; UACR, urine albumin-to-creatinine ratio; CRP, c-reactive protein; TP, total protein; BUN, blood urea nitrogen.

**Table S3**

| GO Term                                               | P value         |
|-------------------------------------------------------|-----------------|
| GO:0051270~regulation of cell motion                  | 6.748175        |
| GO:0030334~regulation of cell migration               | 6.065517        |
| <b>GO:0042981~regulation of apoptosis</b>             | <b>5.894912</b> |
| <b>GO:0043067~regulation of programmed cell death</b> | <b>5.840816</b> |
| <b>GO:0010941~regulation of cell death</b>            | <b>5.814847</b> |
| GO:0040012~regulation of locomotion                   | 5.678864        |
| GO:0010033~response to organic substance              | 5.407627        |
| GO:0008219~cell death                                 | 5.397598        |
| GO:0019220~regulation of phosphate metabolic process  | 5.300013        |
| GO:0051174~regulation of phosphorus metabolic process | 5.300013        |
| GO:0016265~death                                      | 5.26169         |
| GO:0006915~apoptosis                                  | 5.236821        |
| GO:0012501~programmed cell death                      | 5.040145        |
| GO:0042325~regulation of phosphorylation              | 4.962365        |
| GO:0001944~vasculature development                    | 4.60758         |
| GO:0042127~regulation of cell proliferation           | 4.239477        |
| GO:0043549~regulation of kinase activity              | 4.211206        |
| GO:0001568~blood vessel development                   | 4.197242        |
| GO:0033273~response to vitamin                        | 4.193605        |
| GO:0051338~regulation of transferase activity         | 4.178514        |

**Table S4**

| GO Term                                                                   | P value         |
|---------------------------------------------------------------------------|-----------------|
| <b>GO:0000279~M phase</b>                                                 | <b>4.51E-11</b> |
| <b>GO:0007049~cell cycle</b>                                              | <b>8.48E-11</b> |
| <b>GO:0022403~cell cycle phase</b>                                        | <b>1.87E-10</b> |
| <b>GO:0022402~cell cycle process</b>                                      | <b>2.92E-10</b> |
| GO:0048285~organelle fission                                              | 2.96E-10        |
| GO:0000280~nuclear division                                               | 4.10E-10        |
| GO:0007067~mitosis                                                        | 4.10E-10        |
| GO:0000087~M phase of mitotic cell cycle                                  | 6.78E-10        |
| GO:0000278~mitotic cell cycle                                             | 1.21E-09        |
| GO:0051301~cell division                                                  | 1.95E-09        |
| GO:0030198~extracellular matrix organization                              | 3.85E-08        |
| GO:0006260~DNA replication                                                | 6.52E-08        |
| GO:0051726~regulation of cell cycle                                       | 2.08E-07        |
| GO:0006259~DNA metabolic process                                          | 3.55E-07        |
| GO:0000122~negative regulation of transcription from RNA poly II promoter | 1.61E-06        |
| GO:0006974~response to DNA damage stimulus                                | 2.01E-06        |
| GO:0043062~extracellular structure organization                           | 2.66E-06        |
| GO:0042127~regulation of cell proliferation                               | 2.74E-06        |
| GO:0031327~negative regulation of cellular biosynthetic                   | 1.18E-05        |
| GO:0033554~cellular response to stress                                    | 1.39E-05        |

**Table S3: RNA-seq between control and RARRES1 overexpressing podocytes (GO Biological Process for limma p005fc1.5 up DEGs).  
Table S4 DEGs stimulated by TNF- $\alpha$  but down-regulated by RARRES1 KD (GO Biological Process for limma p005fc1.5 down DEGs).**

**Table S5**

| Construct                                   | Linker primer (LF)                                                | Linker primer (LR)                                                       |
|---------------------------------------------|-------------------------------------------------------------------|--------------------------------------------------------------------------|
| <b>RARRES1<math>\Delta</math>aa43-76-V5</b> | 5'-GGGGTCCGGGATCCCAG-3'                                           | 5'-CGCGCTGGGATCCCCGGACCCCGC-3'                                           |
| <b>RARRES1<math>\Delta</math>aa43-55-V5</b> | 5'-GGGGTCCGGGACCGCAGGCTCCTGCA-3'                                  | 5'-GGAGCCTGCGGTCCCCGGACCCCGC-3'                                          |
| <b>RARRES1<math>\Delta</math>FFNF-V5</b>    | 5'-GCAGGCGGCGAGGGCGGCGCTTCACAGATCTGGCT<br>CG CCTAG-3'             | 5'-CGCGCTAGGCGAGCCAGATCTGTGAAGCGCCGCCCTCGC<br>CGCCTGCTGCA-3'             |
| <b>pN1-AAAA-v5</b>                          | 5'-GCAGGCGGCGAGGGCGGCGCTTCACGCGGCTGCTG<br>CTAGATCTGGCTCGCCTAG-3'  | 5'-CGCGCTAGGCGAGCCAGATCTAGCAGCAGCCGCGTGAAG<br>CGCCGCCCTCGCCGCTGCTGCA-3'  |
| <b>pN1-AFNF-v5</b>                          | 5'-GCAGGCGGCGAGGGCGGCGCTTCACGCTTCAACTT<br>CAGATCTGGCTCGCCTAG-3'   | 5'-CGCGCTAGGCGAGCCAGATCTGAAGTTGAAAGCGTGAAG<br>CGCCGCCCTCGCCGCTGCTGCA-3'  |
| <b>pN1-FANF-v5</b>                          | 5'-GCAGGCGGCGAGGGCGGCGCTTCACTTCGCCAACTT<br>C AGATCTGGCTCGCCTAG-3' | 5'-CGCGCTAGGCGAGCCAGATCTGAAGTTAAGCGAAGTGAA<br>GCGCCGCCCTCGCCGCTGCTGCA-3' |
| <b>pN1-FFAF-v5</b>                          | 5'-GCAGGCGGCGAGGGCGGCGCTTCACTTCTTCGCTT<br>CAGATCTGGCTCGCCTAG-3'   | 5'-CGCGCTAGGCGAGCCAGATCTGAAAGCGAAGAAGTGAA<br>GCGCCGCCCTCGCCGCTGCTGCA-3'  |
| <b>pN1-FFNA-v5</b>                          | 5'-GCAGGCGGCGAGGGCGGCGCTTCACTTCTTCAACGC<br>CAGATCTGGCTCGCCTAG-3'  | 5'-CGCGCTAGGCGAGCCAGATCTGGCGTTGAAGAAGTGAA<br>GCGCCGCCCTCGCCGCTGCTGCA-3'  |
| <b>pN1-FFDF-v5</b>                          | 5'-GCAGGCGGCGAGGGCGGCGCTTCACTTCTTCGATT<br>CAGATCTGGCTCGCCTAG-3'   | 5'-CGCGCTAGGCGAGCCAGATCTGAAATCGAAGAAGTGAA<br>GCGCCGCCCTCGCCGCTGCTGCA-3'  |

**Table S5: Primers for construction of human RARRES1 expression plasmids**

## **SUPPLEMENTAL ACKNOWLEDGEMENT**

The Nephrotic Syndrome Study Network Consortium (NEPTUNE), U54-DK-083912, is a part of the National Institutes of Health (NIH) Rare Disease Clinical Research Network (RDCRN), supported through a collaboration between the Office of Rare Diseases Research (ORDR), National Center for Advancing Translational Sciences (NCATS), and the National Institute of Diabetes, Digestive, and Kidney Diseases (NIDDK). Additional funding and/or programmatic support for this project have also been provided by the University of Michigan, the NephCure Kidney International and the Halpin Foundation.

### **Members of the Nephrotic Syndrome Study Network (NEPTUNE)**

#### *NEPTUNE Enrolling Centers*

*Case Western Reserve University, Cleveland, OH:* J Sedor<sup>\*</sup>, K Dell<sup>\*\*</sup>, M Schachere<sup>#</sup>  
*Children's Hospital, Los Angeles, CA:* K Lemley<sup>\*</sup>, L Whitted<sup>#</sup>  
*Children's Mercy Hospital, Kansas City, MO:* T Srivastava<sup>\*</sup>, C Haney<sup>#</sup>  
*Cohen Children's Hospital, New Hyde Park, NY:* C Sethna<sup>\*</sup>, K Grammatikopoulos<sup>#</sup>  
*Columbia University, New York, NY:* G Appel<sup>\*</sup>, M Toledo<sup>#</sup>  
*Emory University, Atlanta, GA:* L Greenbaum<sup>\*</sup>, C Wang<sup>\*\*</sup>, B Lee<sup>#</sup>  
*Harbor-University of California Los Angeles Medical Center:* S Adler<sup>\*</sup>, C Nast<sup>†‡</sup>, J La Page<sup>#</sup>  
*John H. Stroger Jr. Hospital of Cook County, Chicago, IL:* A Athavale<sup>\*</sup>, M Itteera<sup>#</sup>  
*Johns Hopkins Medicine, Baltimore, MD:* A Neu<sup>\*</sup>, S Boynton<sup>#</sup>  
*Mayo Clinic, Rochester, MN:* F Fervenza<sup>\*</sup>, M Hogan<sup>\*\*</sup>, J Lieske<sup>\*</sup>, V Chernitskiy<sup>#</sup>  
*Montefiore Medical Center, Bronx, NY:* F Kaskel<sup>\*</sup>, N Kumar<sup>\*</sup>, P Flynn<sup>#</sup>  
*NIDDK Intramural, Bethesda MD:* J Kopp<sup>\*</sup>, E Castro-Rubio<sup>#</sup>, E Brede<sup>#</sup>  
*New York University Medical Center, New York, NY:* H Trachtman<sup>\*</sup>, O Zhdanova<sup>\*\*</sup>, F Modersitzki<sup>#</sup>, S Vento<sup>#</sup>  
*Stanford University, Stanford, CA:* R Lafayette<sup>\*</sup>, K Mehta<sup>#</sup>  
*Temple University, Philadelphia, PA:* C Gadegbeku<sup>\*</sup>, D Johnstone<sup>\*\*</sup>, Z Pfeffer<sup>#</sup>  
*University Health Network Toronto:* D Cattran<sup>\*</sup>, M Hladunewich<sup>\*\*</sup>, H Reich<sup>\*\*</sup>, P Ling<sup>#</sup>, M Romano<sup>#</sup>  
*University of Miami, Miami, FL:* A Fornoni<sup>\*</sup>, L Barisoni<sup>\*</sup>, C Bidot<sup>#</sup>  
*University of Michigan, Ann Arbor, MI:* M Kretzler<sup>\*</sup>, D Gipson<sup>\*</sup>, A Williams<sup>#</sup>, R Pitter<sup>#</sup>  
*University of North Carolina, Chapel Hill, NC:* P Nachman<sup>\*</sup>, K Gibson<sup>\*</sup>, S Grubbs<sup>#</sup>, Anne Froment<sup>#</sup>  
*University of Pennsylvania, Philadelphia, PA:* L Holzman<sup>\*</sup>, K Meyers<sup>\*\*</sup>, K Kallem<sup>#</sup>, FJ Cerecino<sup>#</sup>  
*University of Texas Southwestern, Dallas, TX:* K Sambandam<sup>\*</sup>, E Brown<sup>\*\*</sup>, N Johnson<sup>#</sup>  
*University of Washington, Seattle, WA:* A Jefferson<sup>\*</sup>, S Hingorani<sup>\*\*</sup>, K Tuttle<sup>\*\*§</sup>, K Klepach<sup>#</sup>, S Dismuke<sup>#</sup>, A Cooper<sup>#§</sup>  
*Wake Forest University, Winston-Salem, NC:* B Freedman<sup>\*</sup>, JJ Lin<sup>\*\*</sup>, M Spainhour<sup>#</sup>, S Gray<sup>#</sup>

*Data Analysis and Coordinating Center:* M Kretzler, L Barisoni, C Gadegbeku, B Gillespie, D Gipson, B Gizinski, L Holzman, L Mariani, M Sampson, P Song, J Troost, J Zee, E Herreshoff, C Kincaid, C Lienczewski, T Mainieri, A Williams

*National Institute of Diabetes and Digestive and Kidney Diseases (NIDDK) Program Office:* K Abbott, C Roy

*The National Center for Advancing Translational Sciences (NCATS) Program Office:* T Urv, PJ Brooks

\*Principal Investigator; \*\*Co-investigator; #Study Coordinator

†Cedars-Sinai Medical Center, Los Angeles, CA

§Providence Medical Research Center, Spokane, WA
